# Supplementary material for: Cryo-EM reconstructions of inhibitor-bound SMG1 kinase reveal an autoinhibitory state dependent on SMG8
Source: eLife. 2021 Oct 26;10:e72353. doi: 10.7554/eLife.72353 (PMC8592573; doi:10.7554/eLife.72353)
Supplement: Figure 4—source data 1. [file elife-72353-fig4-data1.xls]

## Sheet: XLMS_1
Crosslinks Peptide Group ID	Crosslinks	Checked	Crosslink Sequence	Max. XlinkX Score	Crosslinker	Crosslink Type	# CSMs	# Proteins	Sequence A	Modifications A	Accession A	Position A	Sequence B	Modifications B	Accession B	Position B	Protein Descriptions A	Protein Descriptions B	Is Decoy	Q-value	Abundance: F1: Sample	Quan Info	# CSMs	Top Apex RT [min]
27	1832	FALSE	KVVDNASQGEGVR; |;LLVKHAGELR	201.20	DSS	Intra	2	1	[K]VVDNASQGEGVR	1xDSS [K1]	SMG1	1628	LLV[K]HAGELR	1xDSS [K4]	SMG1	1794			FALSE	0.00	13354464.5		2	2021-12-30
78	1832	FALSE	LLAQCSEVQLGKTTTAQDLVQHFK; |; KLSTQGQVDEK	170.94	DSS	Intra	2	1	LLAQCSEVQLG[K]TTTAQDLVQHFK	1xCarbamidomethyl [C5]; 1xDSS [K12]	SMG1	1451	[K]LSTQGQVDEK	1xDSS [K1]	SMG1	1464			FALSE	0.00	12169938.25		2	52.88
79	1832	FALSE	WIQAEWKEISGQLK; |; KVVDNASQGEGVR	165.90	DSS	Intra	2	1	WIQAEW[K]EISGQLK	1xDSS [K7]	SMG1	1533	[K]VVDNASQGEGVR	1xDSS [K1]	SMG1	1628			FALSE	0.00	37250998		2	53.53
107	1832	FALSE	IGPALKTVGLSLDVSR; |; VAEIKVNWFK	129.96	DSS	Intra	1	1	IGPAL[K]TVGLSLDVSR	1xDSS [K6]	SMG1	2258	VAEI[K]VNWFK	1xDSS [K5]	SMG1	2467			FALSE	0.00		NoQuanValues	1
105	1832	FALSE	LSTQGQVDEKWGPELDIEK; |; AEYAVAKSILTLAK	121.73	DSS	Intra	1	1	LSTQGQVDE[K]WGPELDIEK	1xDSS [K10]	SMG1	1474	AEYAVA[K]SILTLAK	1xDSS [K7]	SMG1	1519			FALSE	0.00		NoQuanValues	1
9	1832	FALSE	DPKTGK; |; KLIQK	119.89	DSS	Intra	2	1	DP[K]TGK	1xDSS [K3]	SMG1	3593	[K]LIQK	1xDSS [K1]	SMG1	3557			FALSE	0.00	4139160.25		2	17.47
93	1832	FALSE	WKEPGSGGPQNLSGPGGR; |;IGPALKTVGLSLDVSR	112.84	DSS	Inter	1	2	W[K]EPGSGGPQNLSGPGGR	1xDSS [K2]	SMG9	21	IGPAL[K]TVGLSLDVSR	1xDSS [K6]	SMG1	2258	SMG9		FALSE	0.00		NoQuanValues	1
86	1832	FALSE	WIFSKFSSSAK; |; KSLGQELR	110.24	DSS	Intra	1	1	WIFS[K]FSSSAK	1xDSS [K5]	SMG1	235	[K]SLGQELR	1xDSS [K1]	SMG1	98			FALSE	0.00	1350652125		1	56.88
38	1832	FALSE	KSLGQELR; |;ALATKDMR	109.94	DSS	Intra	1	1	[K]SLGQELR	1xDSS [K1]	SMG1	98	ALAT[K]DMR	1xDSS [K5]	SMG1	127			FALSE	0.00	6264042.5		1	34.88
104	1832	FALSE	TPLNPAKPGSSWIPFK; |; VAEIKVNWFK	105.78	DSS	Intra	1	1	TPLNPA[K]PGSSWIPFK	1xDSS [K7]	SMG1	2059	VAEI[K]VNWFK	1xDSS [K5]	SMG1	2467			FALSE	0.00		NoQuanValues	1
66	1832	FALSE	WKEPGSGGPQNLSGPGGR; |;TPIILSKPPAER	102.71	DSS	Intra	1	1	W[K]EPGSGGPQNLSGPGGR	1xDSS [K2]	SMG9	21	TPIILS[K]PPAER	1xDSS [K7]	SMG9	70	SMG9	SMG9	FALSE	0.00	3279727		1	48.37
28	1832	FALSE	TGKDNWLER; |;IDMKK	100.01	DSS	Intra	3	1	TG[K]DNWLER	1xDSS [K3]	SMG1	875	IDM[K]K	1xOxidation [M3]; 1xDSS [K4]	SMG1	1267			FALSE	0.00	103550055.75		3	37.92
30	1832	FALSE	VPEKVPFR; |; TGKAVQER	97.93	DSS	Intra	1	1	VPE[K]VPFR	1xDSS [K4]	SMG1	2366	TG[K]AVQER	1xDSS [K3]	SMG1	3596			FALSE	0.00	5582433		1	32.09
8	1832	FALSE	YLKQTSR; |;IDMKK	93.04	DSS	Intra	3	1	YL[K]QTSR	1xDSS [K3]	SMG1	1321	IDM[K]K	1xOxidation [M3]; 1xDSS [K4]	SMG1	1267			FALSE	0.00	160307805.25		3	23.62
94	1832	FALSE	IFKWIFSK; |; KSLGQELR	92.76	DSS	Intra	1	1	IF[K]WIFSK	1xDSS [K3]	SMG1	230	[K]SLGQELR	1xDSS [K1]	SMG1	98			FALSE	0.00	288079.25		1	60.23
97	1832	FALSE	TPLNPAKPGSSWIPFK; |; EEKIAIMR	92.76	DSS	Intra	1	1	TPLNPA[K]PGSSWIPFK	1xDSS [K7]	SMG1	2059	EE[K]IAIMR	1xDSS [K3]	SMG1	1998			FALSE	0.00	3316159		1	64.59
95	1832	FALSE	VLPLLKTAIK; |;DCPVGKDWK	91.58	DSS	Intra	2	1	VLPLL[K]TAIK	1xDSS [K6]	SMG8	242	DCPVG[K]DWK	1xCarbamidomethyl [C2]; 1xDSS [K6]	SMG8	252	SMG8	SMG8	FALSE	0.00	75022060		2	61.54
25	1832	FALSE	KLSTQGQVDEK; |;IKEQTVPIR	88.59	DSS	Intra	2	1	[K]LSTQGQVDEK	1xDSS [K1]	SMG1	1464	I[K]EQTVPIR	1xDSS [K2]	SMG1	1407			FALSE	0.00	6120109625		2	28.61
44	1832	FALSE	WKEPGSGGPQNLSGPGGR; |; KSTSSTSLNLK	88.03	DSS	Inter	1	2	W[K]EPGSGGPQNLSGPGGR	1xDSS [K2]	SMG9	21	[K]STSSTSLNLK	1xDSS [K1]	SMG1	1211	SMG9		FALSE	0.00	1155372.75	NotUnique	1	36.27
52	1832	FALSE	LIQKNLATSADTPPSTVPGTGK; |; KVVDNASQGEGVR	87.62	DSS	Intra	2	1	LIQ[K]NLATSADTPPSTVPGTGK	1xDSS [K4]	SMG1	3561	[K]VVDNASQGEGVR	1xDSS [K1]	SMG1	1628			FALSE	0.00	1458567625		2	40.73
45	1832	FALSE	KAVEHNIQIGK;|;KIDIIR	87.04	DSS	Intra	2	1	[K]AVEHNIQIGK	1xDSS [K1]	SMG1	3136	[K]IDIIR	1xDSS [K1]	SMG1	2989			FALSE	0.00	4979529.75		2	36.30
42	1832	FALSE	KVVDNASQGEGVR; |;EISGQLKQVYR	86.72	DSS	Intra	1	1	[K]VVDNASQGEGVR	1xDSS [K1]	SMG1	1628	EISGQL[K]QVYR	1xDSS [K7]	SMG1	1540			FALSE	0.00	73651432		1	35.96
16	1832	FALSE	LLVKHAGELR; |; DPKTGK	86.09	DSS	Intra	2	1	LLV[K]HAGELR	1xDSS [K4]	SMG1	1794	DP[K]TGK	1xDSS [K3]	SMG1	3593			FALSE	0.00	24263280		2	26.37
49	1832	FALSE	QAFGKLLK; |; YLKQTSR	85.18	DSS	Intra	2	1	QAFG[K]LLK	1xDSS [K5]	SMG1	815	YL[K]QTSR	1xDSS [K3]	SMG1	1321			FALSE	0.00	5211137		2	38.70
51	1832	FALSE	GLKPHYAQLMR; |;VMKVMGSGPK	84.24	DSS	Intra	1	1	GL[K]PHYAQLMR	1xDSS [K3]	SMG8	901	VM[K]VMGSGPK	1xDSS [K3]	SMG8	869	SMG8	SMG8	FALSE	0.00	9084878125		1	40.06
98	1832	FALSE	LSTQGQVDEKWGPELDIEK; |;SHLMELGLTAAKFAR	84.17	DSS	Intra	2	1	LSTQGQVDE[K]WGPELDIEK	1xDSS [K10]	SMG1	1474	SHLMELGLTAA[K]FAR	1xDSS [K12]	SMG1	1426			FALSE	0.00	3162536625		2	67.01
15	1832	FALSE	LLVKHAGELR; |; TGKAVQER	83.84	DSS	Intra	3	1	LLV[K]HAGELR	1xDSS [K4]	SMG1	1794	TG[K]AVQER	1xDSS [K3]	SMG1	3596			FALSE	0.00	45918114.5		3	2021-08-26
61	1832	FALSE	SNTGQKTQPDVMSQNAR; |; KLLFLGSDGK	83.84	DSS	Intra	2	1	SNTGQ[K]TQPDVMSQNAR	1xDSS [K6]	SMG1	3545	[K]LLFLGSDGK	1xDSS [K1]	SMG1	2135			FALSE	0.00	6160555.5		2	47.08
43	1832	FALSE	ALATKDMR; |;LATVKQLK	83.23	DSS	Intra	2	1	ALAT[K]DMR	1xDSS [K5]	SMG1	127	LATV[K]QLK	1xDSS [K5]	SMG1	166			FALSE	0.00	3914275.5		2	36.18
91	1832	FALSE	VAEIKVNWFK; |; VPEKVPFR	83.23	DSS	Intra	2	1	VAEI[K]VNWFK	1xDSS [K5]	SMG1	2467	VPE[K]VPFR	1xDSS [K4]	SMG1	2366			FALSE	0.00	7573576875		2	59.88
14	1832	FALSE	KVVDNASQGEGVR;|;KLIQK	81.88	DSS	Intra	1	1	[K]VVDNASQGEGVR	1xDSS [K1]	SMG1	1628	[K]LIQK	1xDSS [K1]	SMG1	3557			FALSE	0.00	2927892.25		1	23.61
47	1832	FALSE	VPEKVPFR; |; KLIQK	81.88	DSS	Intra	1	1	VPE[K]VPFR	1xDSS [K4]	SMG1	2366	[K]LIQK	1xDSS [K1]	SMG1	3557			FALSE	0.00	7706544		1	37.39
90	1832	FALSE	TPLNPAKPGSSWIPFK; |;IQQLEDEVKR	81.38	DSS	Intra	2	1	TPLNPA[K]PGSSWIPFK	1xDSS [K7]	SMG1	2059	IQQLEDEV[K]R	1xDSS [K9]	SMG1	1985			FALSE	0.00	2041976875		2	59.19
5	1832	FALSE	TGKAVQER; |;SVACSPKK	79.03	DSS	Intra	2	1	TG[K]AVQER	1xDSS [K3]	SMG1	3596	SVACSP[K]K	1xCarbamidomethyl [C4]; 1xDSS [K7]	SMG1	3586			FALSE	0.00	4565370625		2	14.82
48	1832	FALSE	KSLGQELR; |;LATVKQLK	79.03	DSS	Intra	2	1	[K]SLGQELR	1xDSS [K1]	SMG1	98	LATV[K]QLK	1xDSS [K5]	SMG1	166			FALSE	0.00	750327		2	38.09
56	1832	FALSE	NSYAVSVWKR; |; LLVKHAGELR	76.85	DSS	Intra	3	1	NSYAVSVW[K]R	1xDSS [K9]	SMG1	3610	LLV[K]HAGELR	1xDSS [K4]	SMG1	1794			FALSE	0.00	16689532.25		3	44.48
26	1832	FALSE	GEKEGQRPTQPVYQIQNR; |; KSSALAEYSR	74.16	DSS	Intra	1	1	GE[K]EGQRPTQPVYQIQNR	1xDSS [K3]	SMG9	137	[K]SSALAEYSR	1xDSS [K1]	SMG9	508	SMG9	SMG9	FALSE	0.00	8859175625		1	29.81
62	1832	FALSE	TTTAQDLVQHFKK; |; IKEQTVPIR	73.93	DSS	Intra	1	1	TTTAQDLVQHF[K]K	1xDSS [K12]	SMG1	1463	I[K]EQTVPIR	1xDSS [K2]	SMG1	1407			FALSE	0.00	1524139875		1	47.34
22	1832	FALSE	LLVKHAGELR; |; KVVDR	73.57	DSS	Intra	1	1	LLV[K]HAGELR	1xDSS [K4]	SMG1	1794	[K]VVDR	1xDSS [K1]	SMG1	1731			FALSE	0.00		NoQuanValues	1
72	1832	FALSE	YTMYQNQLLEKIK; |; KLSTQGQVDEK	72.14	DSS	Intra	1	1	YTMYQNQLLE[K]IK	1xDSS [K11]	SMG1	1405	[K]LSTQGQVDEK	1xDSS [K1]	SMG1	1464			FALSE	0.00	582392		1	50.32
84	1832	FALSE	WIFSKFSSSAK; |;ALATKDMR	69.39	DSS	Intra	2	1	WIFS[K]FSSSAK	1xDSS [K5]	SMG1	235	ALAT[K]DMR	1xDSS [K5]	SMG1	127			FALSE	0.00	2653134.75		2	55.74
108	1832	FALSE	VLEGFLDIDTKFSENR; |; QKVLPLLK	69.09	DSS	Intra	1	1	VLEGFLDIDT[K]FSENR	1xDSS [K11]	SMG8	494	Q[K]VLPLLK	1xDSS [K2]	SMG8	236	SMG8	SMG8	FALSE	0.00		NoQuanValues	1
109	1832	FALSE	EEDLGSPTGELTSKILSSIK; |; QKVLPLLK	69.09	DSS	Intra	1	1	EEDLGSPTGELTS[K]ILSSIK	1xDSS [K14]	SMG8	477	Q[K]VLPLLK	1xDSS [K2]	SMG8	236	SMG8	SMG8	FALSE	0.00		NoQuanValues	1
69	1832	FALSE	RDASEETSTSVMQKTPIILSKPPAER; |; WKEPGSGGPQNLSGPGGR	69.03	DSS	Intra	1	1	RDASEETSTSVMQ[K]TPIILSKPPAER	1xDSS [K14]	SMG9	63	W[K]EPGSGGPQNLSGPGGR	1xDSS [K2]	SMG9	21	SMG9	SMG9	FALSE	0.00	50823996875		1	49.18
54	1832	FALSE	VMKVMGSGPK; |; KIDIIR	67.84	DSS	Inter	2	2	VM[K]VMGSGPK	1xDSS [K3]	SMG8	869	[K]IDIIR	1xDSS [K1]	SMG1	2989	SMG8		FALSE	0.00	27110698125	NotUnique	2	42.16
103	1832	FALSE	LMYNAYEGCANALTSPPKVIR; |; LNKMEIPIAWR	66.68	DSS	Intra	1	1	LMYNAYEGCANALTSPP[K]VIR	1xCarbamidomethyl [C9]; 1xDSS [K18]	SMG1	1006	LN[K]MEIPIAWR	1xDSS [K3]	SMG1	2980			FALSE	0.00		NoQuanValues	1
6	1832	FALSE	ALETVGEKK; |; KSQER	65.29	DSS	Intra	2	1	ALETVGE[K]K	1xDSS [K8]	SMG1	262	[K]SQER	1xDSS [K1]	SMG1	131			FALSE	0.00	5007012.75		2	14.89
12	1832	FALSE	KVVDNASQGEGVR; |;TGKAVQER	64.87	DSS	Intra	2	1	[K]VVDNASQGEGVR	1xDSS [K1]	SMG1	1628	TG[K]AVQER	1xDSS [K3]	SMG1	3596			FALSE	0.00	7135125.75		2	2021-12-19
18	1832	FALSE	LLVKHAGELR; |;SVACSPKK	64.87	DSS	Intra	1	1	LLV[K]HAGELR	1xDSS [K4]	SMG1	1794	SVACSP[K]K	1xCarbamidomethyl [C4]; 1xDSS [K7]	SMG1	3586			FALSE	0.00	3613210.5		1	26.64
110	1832	FALSE	SGLIQWVDGATPLFGLYKR; |; KLLFLGSDGK	64.80	DSS	Intra	1	1	SGLIQWVDGATPLFGLY[K]R	1xDSS [K18]	SMG1	2215	[K]LLFLGSDGK	1xDSS [K1]	SMG1	2135			FALSE	0.00		NoQuanValues	1
59	1832	FALSE	DFGAESKVSVDDLCK; |; KAVEHNIQIGK	64.76	DSS	Intra	2	1	DFGAES[K]VSVDDLCK	1xCarbamidomethyl [C14]; 1xDSS [K7]	SMG1	3127	[K]AVEHNIQIGK	1xDSS [K1]	SMG1	3136			FALSE	0.00	4011200.25		2	44.91
58	1832	FALSE	LKQEAVTVPVCEDQLK; |;RLETSISSCKTSLQR	64.09	DSS	Intra	3	1	L[K]QEAVTVPVCEDQLK	1xCarbamidomethyl [C11]; 1xDSS [K2]	SMG1	2725	RLETSISSC[K]TSLQR	1xCarbamidomethyl [C9]; 1xDSS [K10]	SMG1	3183			FALSE	0.00	78623050		3	44.74
100	1832	FALSE	LLYLCATYKALETVGEK; |; QLKEFIQQPENK	63.49	DSS	Intra	1	1	LLYLCATY[K]ALETVGEK	1xCarbamidomethyl [C5]; 1xDSS [K9]	SMG1	254	QL[K]EFIQQPENK	1xDSS [K3]	SMG1	169			FALSE	0.00	1301305375		1	68.30
32	1832	FALSE	VPEKVPFR; |; DPKTGK	63.09	DSS	Intra	2	1	VPE[K]VPFR	1xDSS [K4]	SMG1	2366	DP[K]TGK	1xDSS [K3]	SMG1	3593			FALSE	0.00	8118736.75		2	32.92
75	1832	FALSE	EFIQQPENKLVLVK; |; ALATKDMR	62.52	DSS	Intra	2	1	EFIQQPEN[K]LVLVK	1xDSS [K9]	SMG1	178	ALAT[K]DMR	1xOxidation [M7]; 1xDSS [K5]	SMG1	127			FALSE	0.00	17872567.5		2	54.59
35	1832	FALSE	GEKEGQRPTQPVYQIQNR; |; WKEPGSGGPQNLSGPGGR	62.30	DSS	Intra	1	1	GE[K]EGQRPTQPVYQIQNR	1xDSS [K3]	SMG9	137	W[K]EPGSGGPQNLSGPGGR	1xDSS [K2]	SMG9	21	SMG9	SMG9	FALSE	0.00	742533.5		1	33.88
46	1832	FALSE	IQQLEDEVKR; |; HLLKAMAK	62.00	DSS	Intra	1	1	IQQLEDEV[K]R	1xDSS [K9]	SMG1	1985	HLL[K]AMAK	1xDSS [K4]	SMG1	3426			FALSE	0.00	2589250.5		1	36.65
37	1832	FALSE	VHADIQNDEKGGYSVNGGSGENTYGR; |; KSLGQELR	61.84	DSS	Intra	2	1	VHADIQNDE[K]GGYSVNGGSGENTYGR	1xDSS [K10]	SMG1	81	[K]SLGQELR	1xDSS [K1]	SMG1	98			FALSE	0.00	7909455.5		2	34.26
74	1832	FALSE	ELQKSIEVQLLR; |; YLKQTSR	61.32	DSS	Intra	1	1	ELQ[K]SIEVQLLR	1xDSS [K4]	SMG1	1283	YL[K]QTSR	1xDSS [K3]	SMG1	1321			FALSE	0.00	29209715625		1	51.42
64	1832	FALSE	IQQLEDEVKR; |; QLGDVKHLLK	60.79	DSS	Intra	1	1	IQQLEDEV[K]R	1xDSS [K9]	SMG1	1985	QLGDV[K]HLLK	1xDSS [K6]	SMG1	3422			FALSE	0.00	2286310.75		1	48.28
85	1832	FALSE	FHSLPKSGEKPEADR; |; GLLPKFSSWSLVK	60.59	DSS	Intra	3	1	FHSLP[K]SGEKPEADR	1xDSS [K6]	SMG8	585	GLLP[K]FSSWSLVK	1xDSS [K5]	SMG8	762	SMG8	SMG8	FALSE	0.00	159115278125		3	55.98
99	1832	FALSE	IGPALKTVGLSLDVSR; |;TPIILSKPPAER	60.56	DSS	Inter	1	2	IGPAL[K]TVGLSLDVSR	1xDSS [K6]	SMG1	2258	TPIILS[K]PPAER	1xDSS [K7]	SMG9	70		SMG9	FALSE	0.00	401563.5	NotUnique	1	67.58
23	1832	FALSE	TGKDNWLER; |; MKHSIK	59.89	DSS	Inter	2	2	TG[K]DNWLER	1xDSS [K3]	SMG1	875	M[K]HSIK	1xDSS [K2]	SMG9	178		SMG9	FALSE	0.00	17336410	NotUnique	2	28.22
60	1832	FALSE	FMCSGPDKVMK; |; KIDIIR	59.82	DSS	Inter	1	2	FMCSGPD[K]VMK	1xCarbamidomethyl [C3]; 1xDSS [K8]	SMG8	866	[K]IDIIR	1xDSS [K1]	SMG1	2989	SMG8		FALSE	0.00		NoQuanValues	1
36	1832	FALSE	VHADIQNDEKGGYSVNGGSGENTYGR; |;TDSASADPGNLKYSSSR	58.98	DSS	Intra	1	1	VHADIQNDE[K]GGYSVNGGSGENTYGR	1xDSS [K10]	SMG1	81	TDSASADPGNL[K]YSSSR	1xDSS [K12]	SMG1	39			FALSE	0.00	4069609375		1	34.03
29	1832	FALSE	LLVKHAGELR; |; KLIQK	58.74	DSS	Intra	1	1	LLV[K]HAGELR	1xDSS [K4]	SMG1	1794	[K]LIQK	1xDSS [K1]	SMG1	3557			FALSE	0.00	530855375		1	30.89
41	1832	FALSE	VPEKVPFR; |; GKSLR	58.74	DSS	Intra	1	1	VPE[K]VPFR	1xDSS [K4]	SMG1	2366	G[K]SLR	1xDSS [K2]	SMG1	2359			FALSE	0.00	42176056		1	35.15
31	1832	FALSE	FSSSAKDEVK; |; KSLGQELR	58.17	DSS	Intra	1	1	FSSSA[K]DEVK	1xDSS [K6]	SMG1	241	[K]SLGQELR	1xDSS [K1]	SMG1	98			FALSE	0.00	1221879.5		1	32.12
77	1832	FALSE	WKEPGSGGPQNLSGPGGR; |; KLLFLGSDGK	58.17	DSS	Inter	2	2	W[K]EPGSGGPQNLSGPGGR	1xDSS [K2]	SMG9	21	[K]LLFLGSDGK	1xDSS [K1]	SMG1	2135	SMG9		FALSE	0.00	70015724375	NotUnique	2	52.87
88	1832	FALSE	EISGQLKQVYR; |; VAEIKVNWFK	58.17	DSS	Intra	1	1	EISGQL[K]QVYR	1xDSS [K7]	SMG1	1540	VAEI[K]VNWFK	1xDSS [K5]	SMG1	2467			FALSE	0.00		NoQuanValues	1
92	1832	FALSE	LIQKNLATSADTPPSTVPGTGK; |;VAEIKVNWFK	57.49	DSS	Intra	1	1	LIQ[K]NLATSADTPPSTVPGTGK	1xDSS [K4]	SMG1	3561	VAEI[K]VNWFK	1xDSS [K5]	SMG1	2467			FALSE	0.00		NoQuanValues	1
3	1832	FALSE	AVRDPKTGK; |;SVACSPKK	57.46	DSS	Intra	1	1	AVRDP[K]TGK	1xDSS [K6]	SMG1	3593	SVACSP[K]K	1xCarbamidomethyl [C4]; 1xDSS [K7]	SMG1	3586			FALSE	0.00	39593759375		1	14.15
82	1832	FALSE	EFIQQPENKLVLVK; |; KSLGQELR	57.45	DSS	Intra	1	1	EFIQQPEN[K]LVLVK	1xDSS [K9]	SMG1	178	[K]SLGQELR	1xDSS [K1]	SMG1	98			FALSE	0.00	4584409		1	55.63
13	1832	FALSE	SVACSPKK; |; KLIQK	56.75	DSS	Intra	2	1	SVACSP[K]K	1xCarbamidomethyl [C4]; 1xDSS [K7]	SMG1	3586	[K]LIQK	1xDSS [K1]	SMG1	3557			FALSE	0.00	3563745375		2	19.13
53	1832	FALSE	QAFGKLLK; |; IDMKK	56.51	DSS	Intra	2	1	QAFG[K]LLK	1xDSS [K5]	SMG1	815	IDM[K]K	1xDSS [K4]	SMG1	1267			FALSE	0.00	24695527		2	41.28
17	1832	FALSE	KLSTQGQVDEK; |;SVKAEYAVAK	55.72	DSS	Intra	2	1	[K]LSTQGQVDEK	1xDSS [K1]	SMG1	1464	SV[K]AEYAVAK	1xDSS [K3]	SMG1	1512			FALSE	0.00	7314126875		2	26.44
7	1832	FALSE	TGKAVQER; |; GKSLR	55.06	DSS	Intra	1	1	TG[K]AVQER	1xDSS [K3]	SMG1	3596	G[K]SLR	1xDSS [K2]	SMG1	2359			FALSE	0.00	2727356.75		1	15.93
21	1832	FALSE	KIDIIR;|;KQAPR	55.06	DSS	Inter	1	2	[K]IDIIR	1xDSS [K1]	SMG1	2989	[K]QAPR	1xDSS [K1]	SMG8	616		SMG8	FALSE	0.00	1480518.5	NotUnique	1	27.31
65	1832	FALSE	WIQAEWKEISGQLK; |; NSASPKHSLNGESR	53.77	DSS	Intra	1	1	WIQAEW[K]EISGQLK	1xDSS [K7]	SMG1	1533	NSASP[K]HSLNGESR	1xDSS [K6]	SMG1	1156			FALSE	0.00		NoQuanValues	1
80	1832	FALSE	IQQLEDEVKR; |; VAEIKVNWFK	52.64	DSS	Intra	2	1	IQQLEDEV[K]R	1xDSS [K9]	SMG1	1985	VAEI[K]VNWFK	1xDSS [K5]	SMG1	2467			FALSE	0.00	35757995625		2	55.33
83	1832	FALSE	DFGAESKVSVDDLCK; |; KIDIIR	52.59	DSS	Intra	1	1	DFGAES[K]VSVDDLCK	1xCarbamidomethyl [C14]; 1xDSS [K7]	SMG1	3127	[K]IDIIR	1xDSS [K1]	SMG1	2989			FALSE	0.00	38447508		1	55.75
19	1832	FALSE	SNTGQKTQPDVMSQNAR; |; KVVDNASQGEGVR	52.49	DSS	Intra	1	1	SNTGQ[K]TQPDVMSQNAR	1xDSS [K6]	SMG1	3545	[K]VVDNASQGEGVR	1xDSS [K1]	SMG1	1628			FALSE	0.00	9249608125		1	26.60
2	1832	FALSE	ALATKDMR; |; KSQER	52.36	DSS	Intra	3	1	ALAT[K]DMR	1xOxidation [M7]; 1xDSS [K5]	SMG1	127	[K]SQER	1xDSS [K1]	SMG1	131			FALSE	0.00	88412479125		3	15.52
34	1832	FALSE	ALETVGEKK; |; KSLGQELR	51.69	DSS	Intra	2	1	ALETVGE[K]K	1xDSS [K8]	SMG1	262	[K]SLGQELR	1xDSS [K1]	SMG1	98			FALSE	0.00	16398596875		2	33.75
1	1832	FALSE	NQDPAHPDKPK; |; KHSPK	50.16	DSS	Intra	2	1	NQDPAHPD[K]PK	1xDSS [K9]	SMG8	290	[K]HSPK	1xDSS [K1]	SMG8	293	SMG8	SMG8	FALSE	0.00	30954873		2	1935-09-01
55	1832	FALSE	EEGKGPVAVTGASTPEGTAPPPPAAPAPPK; |; KSTSSTSLNLK	50.13	DSS	Inter	1	2	EEG[K]GPVAVTGASTPEGTAPPPPAAPAPPK	1xDSS [K4]	SMG9	108	[K]STSSTSLNLK	1xDSS [K1]	SMG1	1211	SMG9		FALSE	0.00	1087477.25	NotUnique	1	43.66
57	1832	FALSE	IQQLEDEVKR; |; EEKIAIMR	50.12	DSS	Intra	1	1	IQQLEDEV[K]R	1xDSS [K9]	SMG1	1985	EE[K]IAIMR	1xDSS [K3]	SMG1	1998			FALSE	0.00	1650037		1	44.70
11	1832	FALSE	KSLGQELR;|;KSQER	49.44	DSS	Intra	2	1	[K]SLGQELR	1xDSS [K1]	SMG1	98	[K]SQER	1xDSS [K1]	SMG1	131			FALSE	0.00	20866215		2	18.28
67	1832	FALSE	AMAKDEEAALADGEDVPYENSVR; |;IQQLEDEVKR	49.36	DSS	Intra	1	1	AMA[K]DEEAALADGEDVPYENSVR	1xDSS [K4]	SMG1	3430	IQQLEDEV[K]R	1xDSS [K9]	SMG1	1985			FALSE	0.00	837326.75		1	48.68
101	1832	FALSE	DDPFDIKAANYDFYQLLEEK; |; SGEKPEADRNPPVLYHNSR	49.00	DSS	Intra	1	1	DDPFDI[K]AANYDFYQLLEEK	1xDSS [K7]	SMG8	627	SGE[K]PEADRNPPVLYHNSR	1xDSS [K4]	SMG8	589	SMG8	SMG8	FALSE	0.00		NoQuanValues	1
39	1832	FALSE	TDSASADPGNLKYSSSR; |; ALATKDMR	47.91	DSS	Intra	1	1	TDSASADPGNL[K]YSSSR	1xDSS [K12]	SMG1	39	ALAT[K]DMR	1xDSS [K5]	SMG1	127			FALSE	0.00	1633732125		1	34.98
73	1832	FALSE	VAEIKVNWFK; |; KLIQK	47.81	DSS	Intra	2	1	VAEI[K]VNWFK	1xDSS [K5]	SMG1	2467	[K]LIQK	1xDSS [K1]	SMG1	3557			FALSE	0.00	4825795625		2	50.85
40	1832	FALSE	NSYAVSVWKR; |; TGKAVQER	46.69	DSS	Intra	1	1	NSYAVSVW[K]R	1xDSS [K9]	SMG1	3610	TG[K]AVQER	1xDSS [K3]	SMG1	3596			FALSE	0.00	5829726.5		1	35.02
33	1832	FALSE	KEEKIAIMR; |;AIPGKR	45.93	DSS	Inter	1	2	[K]EEKIAIMR	1xDSS [K1]	SMG1	1995	AIPG[K]R	1xDSS [K5]	SMG8	827		SMG8	FALSE	0.00		NoQuanValues	1
50	1832	FALSE	EEKIAIMR; |;AIPGKR	45.93	DSS	Inter	1	2	EE[K]IAIMR	1xDSS [K3]	SMG1	1998	AIPG[K]R	1xDSS [K5]	SMG8	827		SMG8	FALSE	0.00	746680	NotUnique	1	39.31
87	1832	FALSE	WQSITENVVKYLK; |; EKIDMK	45.93	DSS	Intra	1	1	WQSITENVV[K]YLK	1xDSS [K10]	SMG1	1318	E[K]IDMK	1xDSS [K2]	SMG1	1263			FALSE	0.00	6741440.5		1	57.30
70	1832	FALSE	SNTGQKTQPDVMSQNAR; |; VAEIKVNWFK	45.72	DSS	Intra	1	1	SNTGQ[K]TQPDVMSQNAR	1xDSS [K6]	SMG1	3545	VAEI[K]VNWFK	1xDSS [K5]	SMG1	2467			FALSE	0.00	10105790625		1	49.93
96	1832	FALSE	SETYAPLFSLPSFHKFCK; |; KDNLNQDTR	45.31	DSS	Intra	1	1	SETYAPLFSLPSFH[K]FCK	1xCarbamidomethyl [C17]; 1xDSS [K15]	SMG1	755	[K]DNLNQDTR	1xDSS [K1]	SMG1	716			FALSE	0.00	5154812.5		1	61.77
81	1832	FALSE	SNTGQKTQPDVMSQNAR; |;IGPALKTVGLSLDVSR	44.32	DSS	Intra	1	1	SNTGQ[K]TQPDVMSQNAR	1xDSS [K6]	SMG1	3545	IGPAL[K]TVGLSLDVSR	1xDSS [K6]	SMG1	2258			FALSE	0.00	8261325625		1	55.59
20	1832	FALSE	SNTGQKTQPDVMSQNAR; |; KLIQK	44.13	DSS	Intra	1	1	SNTGQ[K]TQPDVMSQNAR	1xDSS [K6]	SMG1	3545	[K]LIQK	1xDSS [K1]	SMG1	3557			FALSE	0.00	1811813.5		1	2021-06-27
24	1832	FALSE	HLLKAMAK; |; KLIQK	43.26	DSS	Intra	1	1	HLL[K]AMAK	1xDSS [K4]	SMG1	3426	[K]LIQK	1xDSS [K1]	SMG1	3557			FALSE	0.00	36968184375		1	28.56
106	1832	FALSE	ESALKALNSDMPLYILSSSQGR; |;FMCSGPDKVMK	43.25	DSS	Intra	1	1	ESAL[K]ALNSDMPLYILSSSQGR	1xDSS [K5]	SMG8	881	FMCSGPD[K]VMK	1xCarbamidomethyl [C3]; 1xDSS [K8]	SMG8	866	SMG8	SMG8	FALSE	0.00		NoQuanValues	1
68	1832	FALSE	NLATSADTPPSTVPGTGKSVACSPK; |; NSYAVSVWKR	43.12	DSS	Intra	1	1	NLATSADTPPSTVPGTG[K]SVACSPK	1xCarbamidomethyl [C22]; 1xDSS [K18]	SMG1	3579	NSYAVSVW[K]R	1xDSS [K9]	SMG1	3610			FALSE	0.00	2348636.25		1	48.76
89	1832	FALSE	DWKLNCRPCPPR; |;VLPLLKTAIK	43.03	DSS	Intra	1	1	DW[K]LNCRPCPPR	2xCarbamidomethyl [C6; C9]; 1xDSS [K3]	SMG8	255	VLPLL[K]TAIK	1xDSS [K6]	SMG8	242	SMG8	SMG8	FALSE	0.00	3650836875		1	58.54
102	1832	FALSE	EEDLGSPTGELTSKILSSIK; |; TAIKDCPVGK	43.03	DSS	Intra	1	1	EEDLGSPTGELTS[K]ILSSIK	1xDSS [K14]	SMG8	477	TAI[K]DCPVGK	1xCarbamidomethyl [C6]; 1xDSS [K4]	SMG8	246	SMG8	SMG8	FALSE	0.00		NoQuanValues	1
4	1832	FALSE	DPKTGK; |; GKSLR	41.19	DSS	Intra	1	1	DP[K]TGK	1xDSS [K3]	SMG1	3593	G[K]SLR	1xDSS [K2]	SMG1	2359			FALSE	0.00	1988619375		1	14.45
76	1832	FALSE	TVLSKPTDSSPEVINYLGNK; |; KSTSSTSLNLK	41.19	DSS	Intra	1	1	TVLS[K]PTDSSPEVINYLGNK	1xDSS [K5]	SMG1	1170	[K]STSSTSLNLK	1xDSS [K1]	SMG1	1211			FALSE	0.00		NoQuanValues	1
71	1832	FALSE	TPIILSKPPAER; |; NLVLKESQR	41.03	DSS	Inter	1	2	TPIILS[K]PPAER	1xDSS [K7]	SMG9	70	NLVL[K]ESQR	1xDSS [K5]	SMG1	3287	SMG9		FALSE	0.00	1705169375	NotUnique	1	50.28
10	1832	FALSE	KVVDNASQGEGVR; |;DPKTGK	40.04	DSS	Intra	1	1	[K]VVDNASQGEGVR	1xDSS [K1]	SMG1	1628	DP[K]TGK	1xDSS [K3]	SMG1	3593			FALSE	0.00	13221798		1	18.26
63	1832	FALSE	EISGQLKQVYR; |; KIDIIR	40.04	DSS	Intra	1	1	EISGQL[K]QVYR	1xDSS [K7]	SMG1	1540	[K]IDIIR	1xDSS [K1]	SMG1	2989			FALSE	0.00	5928404375		1	47.62

## Sheet: XLMS_2
Crosslinks Peptide Group ID	Crosslinks	Checked	Crosslink Sequence	Max. XlinkX Score	Crosslinker	Crosslink Type	# CSMs	# Proteins	Sequence A	Modifications A	Accession A	Position A	Sequence B	Modifications B	Accession B	Position B	Protein Descriptions A	Protein Descriptions B	Is Decoy	Q-value	Abundance: F2: Sample	Quan Info	# CSMs	Top Apex RT [min]
76	1834	FALSE	WIQAEWKEISGQLK; |; KVVDNASQGEGVR	178.08	DSS	Intra	2	1	WIQAEW[K]EISGQLK	1xDSS [K7]	SMG1	1533	[K]VVDNASQGEGVR	1xDSS [K1]	SMG1	1628			FALSE	0.00	21699437.5		2	53.59
27	1834	FALSE	KVVDNASQGEGVR; |;LLVKHAGELR	137.44	DSS	Intra	2	1	[K]VVDNASQGEGVR	1xDSS [K1]	SMG1	1628	LLV[K]HAGELR	1xDSS [K4]	SMG1	1794			FALSE	0.00	13139714		2	30.23
58	1834	FALSE	LKQEAVTVPVCEDQLK; |;RLETSISSCKTSLQR	132.57	DSS	Intra	5	1	L[K]QEAVTVPVCEDQLK	1xCarbamidomethyl [C11]; 1xDSS [K2]	SMG1	2725	RLETSISSC[K]TSLQR	1xCarbamidomethyl [C9]; 1xDSS [K10]	SMG1	3183			FALSE	0.00	102500231.75		5	44.73
34	1834	FALSE	WKEPGSGGPQNLSGPGGR; |; KVVDNASQGEGVR	126.07	DSS	Inter	2	2	W[K]EPGSGGPQNLSGPGGR	1xDSS [K2]	SMG9	21	[K]VVDNASQGEGVR	1xDSS [K1]	SMG1	1628	SMG9		FALSE	0.00	3340772.75	NotUnique	2	32.71
7	1834	FALSE	NSASPKHSLNGESR; |; KVVDNASQGEGVR	111.01	DSS	Intra	1	1	NSASP[K]HSLNGESR	1xDSS [K6]	SMG1	1156	[K]VVDNASQGEGVR	1xDSS [K1]	SMG1	1628			FALSE	0.00	3184972.25		1	19.69
88	1834	FALSE	VAEIKVNWFK; |; VPEKVPFR	110.17	DSS	Intra	2	1	VAEI[K]VNWFK	1xDSS [K5]	SMG1	2467	VPE[K]VPFR	1xDSS [K4]	SMG1	2366			FALSE	0.00	3743235.25		2	59.85
40	1834	FALSE	KVVDNASQGEGVR; |;EISGQLKQVYR	108.24	DSS	Intra	2	1	[K]VVDNASQGEGVR	1xDSS [K1]	SMG1	1628	EISGQL[K]QVYR	1xDSS [K7]	SMG1	1540			FALSE	0.00	93428234		2	36.04
29	1834	FALSE	TGKDNWLER; |;IDMKK	100.01	DSS	Intra	4	1	TG[K]DNWLER	1xDSS [K3]	SMG1	875	IDM[K]K	1xOxidation [M3]; 1xDSS [K4]	SMG1	1267			FALSE	0.00	102516719625		4	37.88
87	1834	FALSE	TPLNPAKPGSSWIPFK; |;IQQLEDEVKR	99.38	DSS	Intra	2	1	TPLNPA[K]PGSSWIPFK	1xDSS [K7]	SMG1	2059	IQQLEDEV[K]R	1xDSS [K9]	SMG1	1985			FALSE	0.00	11722862.5		2	59.23
2	1834	FALSE	TGKAVQER; |;SVACSPKK	94.95	DSS	Intra	1	1	TG[K]AVQER	1xDSS [K3]	SMG1	3596	SVACSP[K]K	1xCarbamidomethyl [C4]; 1xDSS [K7]	SMG1	3586			FALSE	0.00	2440052		1	14.71
74	1834	FALSE	TVLSKPTDSSPEVINYLGNK; |; KSTSSTSLNLK	94.89	DSS	Intra	2	1	TVLS[K]PTDSSPEVINYLGNK	1xDSS [K5]	SMG1	1170	[K]STSSTSLNLK	1xDSS [K1]	SMG1	1211			FALSE	0.00	2227790.75		2	52.25
24	1834	FALSE	GEKEGQRPTQPVYQIQNR; |; KSTSSTSLNLK	94.41	DSS	Inter	1	2	GE[K]EGQRPTQPVYQIQNR	1xDSS [K3]	SMG9	137	[K]STSSTSLNLK	1xDSS [K1]	SMG1	1211	SMG9		FALSE	0.00	7580102	NotUnique	1	29.68
42	1834	FALSE	KAVEHNIQIGK;|;KIDIIR	94.41	DSS	Intra	2	1	[K]AVEHNIQIGK	1xDSS [K1]	SMG1	3136	[K]IDIIR	1xDSS [K1]	SMG1	2989			FALSE	0.00	7716635.25		2	36.29
14	1834	FALSE	LLVKHAGELR; |; TGKAVQER	94.15	DSS	Intra	3	1	LLV[K]HAGELR	1xDSS [K4]	SMG1	1794	TG[K]AVQER	1xDSS [K3]	SMG1	3596			FALSE	0.00	62037143		3	26.23
28	1834	FALSE	KSLGQELR; |;ALATKDMR	94.15	DSS	Intra	2	1	[K]SLGQELR	1xDSS [K1]	SMG1	98	ALAT[K]DMR	1xOxidation [M7]; 1xDSS [K5]	SMG1	127			FALSE	0.00	9128605		2	34.91
50	1834	FALSE	KSLGQELR; |;LATVKQLK	88.63	DSS	Intra	1	1	[K]SLGQELR	1xDSS [K1]	SMG1	98	LATV[K]QLK	1xDSS [K5]	SMG1	166			FALSE	0.00	6932168125		1	38.01
31	1834	FALSE	VPEKVPFR; |; TGKAVQER	87.84	DSS	Intra	1	1	VPE[K]VPFR	1xDSS [K4]	SMG1	2366	TG[K]AVQER	1xDSS [K3]	SMG1	3596			FALSE	0.00	9114922		1	32.13
54	1834	FALSE	LIQKNLATSADTPPSTVPGTGK; |; KVVDNASQGEGVR	87.62	DSS	Intra	1	1	LIQ[K]NLATSADTPPSTVPGTGK	1xDSS [K4]	SMG1	3561	[K]VVDNASQGEGVR	1xDSS [K1]	SMG1	1628			FALSE	0.00	7037221875		1	40.76
17	1834	FALSE	KLSTQGQVDEK; |;SVKAEYAVAK	83.84	DSS	Intra	2	1	[K]LSTQGQVDEK	1xDSS [K1]	SMG1	1464	SV[K]AEYAVAK	1xDSS [K3]	SMG1	1512			FALSE	0.00	1354778.5		2	26.60
18	1834	FALSE	LLVKHAGELR; |;SVACSPKK	83.23	DSS	Intra	2	1	LLV[K]HAGELR	1xDSS [K4]	SMG1	1794	SVACSP[K]K	1xCarbamidomethyl [C4]; 1xDSS [K7]	SMG1	3586			FALSE	0.00	5138987375		2	26.79
41	1834	FALSE	ALATKDMR; |;LATVKQLK	83.23	DSS	Intra	2	1	ALAT[K]DMR	1xDSS [K5]	SMG1	127	LATV[K]QLK	1xDSS [K5]	SMG1	166			FALSE	0.00	4788752.5		2	36.18
11	1834	FALSE	YLKQTSR; |;IDMKK	82.50	DSS	Intra	2	1	YL[K]QTSR	1xDSS [K3]	SMG1	1321	IDM[K]K	1xDSS [K4]	SMG1	1267			FALSE	0.00	123119052		2	23.71
90	1834	FALSE	VLPLLKTAIK; |;DCPVGKDWK	82.26	DSS	Intra	1	1	VLPLL[K]TAIK	1xDSS [K6]	SMG8	242	DCPVG[K]DWK	1xCarbamidomethyl [C2]; 1xDSS [K6]	SMG8	252	SMG8	SMG8	FALSE	0.00	34426404		1	61.56
16	1834	FALSE	YLKQTSR; |; EKIDMK	81.52	DSS	Intra	1	1	YL[K]QTSR	1xDSS [K3]	SMG1	1321	E[K]IDMK	1xDSS [K2]	SMG1	1263			FALSE	0.00	1154544.75		1	26.52
84	1834	FALSE	WIFSKFSSSAK; |; KSLGQELR	81.30	DSS	Intra	1	1	WIFS[K]FSSSAK	1xDSS [K5]	SMG1	235	[K]SLGQELR	1xDSS [K1]	SMG1	98			FALSE	0.00	6874596875		1	56.91
67	1834	FALSE	WKEPGSGGPQNLSGPGGR; |;TPIILSKPPAER	79.47	DSS	Intra	1	1	W[K]EPGSGGPQNLSGPGGR	1xDSS [K2]	SMG9	21	TPIILS[K]PPAER	1xDSS [K7]	SMG9	70	SMG9	SMG9	FALSE	0.00	2128441		1	48.29
81	1834	FALSE	EFIQQPENKLVLVK; |; KSLGQELR	76.80	DSS	Intra	2	1	EFIQQPEN[K]LVLVK	1xDSS [K9]	SMG1	178	[K]SLGQELR	1xDSS [K1]	SMG1	98			FALSE	0.00	6972876375		2	55.61
15	1834	FALSE	LLVKHAGELR; |; DPKTGK	76.53	DSS	Intra	3	1	LLV[K]HAGELR	1xDSS [K4]	SMG1	1794	DP[K]TGK	1xDSS [K3]	SMG1	3593			FALSE	0.00	23151467375		3	26.48
35	1834	FALSE	VPEKVPFR; |; DPKTGK	76.53	DSS	Intra	2	1	VPE[K]VPFR	1xDSS [K4]	SMG1	2366	DP[K]TGK	1xDSS [K3]	SMG1	3593			FALSE	0.00	16012292		2	32.95
43	1834	FALSE	WKEPGSGGPQNLSGPGGR; |; KSTSSTSLNLK	76.03	DSS	Inter	1	2	W[K]EPGSGGPQNLSGPGGR	1xDSS [K2]	SMG9	21	[K]STSSTSLNLK	1xDSS [K1]	SMG1	1211	SMG9		FALSE	0.00	1322984625	NotUnique	1	36.32
62	1834	FALSE	TTTAQDLVQHFKK; |; IKEQTVPIR	75.21	DSS	Intra	2	1	TTTAQDLVQHF[K]K	1xDSS [K12]	SMG1	1463	I[K]EQTVPIR	1xDSS [K2]	SMG1	1407			FALSE	0.00	3076700875		2	47.38
89	1834	FALSE	IFKWIFSK; |; KSLGQELR	74.83	DSS	Intra	1	1	IF[K]WIFSK	1xDSS [K3]	SMG1	230	[K]SLGQELR	1xDSS [K1]	SMG1	98			FALSE	0.00		NoQuanValues	1
46	1834	FALSE	VPEKVPFR; |; KLIQK	73.42	DSS	Intra	2	1	VPE[K]VPFR	1xDSS [K4]	SMG1	2366	[K]LIQK	1xDSS [K1]	SMG1	3557			FALSE	0.00	20542827.5		2	37.36
25	1834	FALSE	FSSSAKDEVK; |; ALATKDMR	69.38	DSS	Intra	1	1	FSSSA[K]DEVK	1xDSS [K6]	SMG1	241	ALAT[K]DMR	1xDSS [K5]	SMG1	127			FALSE	0.00	524147625		1	29.81
26	1834	FALSE	GEKEGQRPTQPVYQIQNR; |; KSSALAEYSR	69.34	DSS	Intra	1	1	GE[K]EGQRPTQPVYQIQNR	1xDSS [K3]	SMG9	137	[K]SSALAEYSR	1xDSS [K1]	SMG9	508	SMG9	SMG9	FALSE	0.00	541571125		1	29.89
73	1834	FALSE	LSTQGQVDEKWGPELDIEK; |; SVKAEYAVAK	69.34	DSS	Intra	1	1	LSTQGQVDE[K]WGPELDIEK	1xDSS [K10]	SMG1	1474	SV[K]AEYAVAK	1xDSS [K3]	SMG1	1512			FALSE	0.00	2811054		1	52.23
52	1834	FALSE	GLKPHYAQLMR; |;VMKVMGSGPK	68.91	DSS	Intra	1	1	GL[K]PHYAQLMR	1xDSS [K3]	SMG8	901	VM[K]VMGSGPK	1xDSS [K3]	SMG8	869	SMG8	SMG8	FALSE	0.00		NoQuanValues	1
5	1834	FALSE	TGKAVQER; |; KLIQK	66.54	DSS	Intra	1	1	TG[K]AVQER	1xDSS [K3]	SMG1	3596	[K]LIQK	1xDSS [K1]	SMG1	3557			FALSE	0.00	3465761.75		1	18.64
3	1834	FALSE	DPKTGK; |; KLIQK	65.29	DSS	Intra	1	1	DP[K]TGK	1xDSS [K3]	SMG1	3593	[K]LIQK	1xDSS [K1]	SMG1	3557			FALSE	0.00	1287567		1	17.52
12	1834	FALSE	KVVDNASQGEGVR;|;KLIQK	65.29	DSS	Intra	2	1	[K]VVDNASQGEGVR	1xDSS [K1]	SMG1	1628	[K]LIQK	1xDSS [K1]	SMG1	3557			FALSE	0.00	13300159		2	23.75
38	1834	FALSE	VHADIQNDEKGGYSVNGGSGENTYGR; |; KSLGQELR	64.87	DSS	Intra	1	1	VHADIQNDE[K]GGYSVNGGSGENTYGR	1xDSS [K10]	SMG1	81	[K]SLGQELR	1xDSS [K1]	SMG1	98			FALSE	0.00	5004917.5		1	34.25
39	1834	FALSE	NSYAVSVWKR; |; TGKAVQER	64.87	DSS	Intra	1	1	NSYAVSVW[K]R	1xDSS [K9]	SMG1	3610	TG[K]AVQER	1xDSS [K3]	SMG1	3596			FALSE	0.00	13681326		1	35.05
93	1834	FALSE	AMAKDEEAALADGEDVPYENSVR; |;TPLNPAKPGSSWIPFK	64.71	DSS	Intra	1	1	AMA[K]DEEAALADGEDVPYENSVR	1xDSS [K4]	SMG1	3430	TPLNPA[K]PGSSWIPFK	1xDSS [K7]	SMG1	2059			FALSE	0.00	8620308		1	64.50
65	1834	FALSE	TPIILSKPPAER; |; VMKVMGSGPK	64.57	DSS	Inter	1	2	TPIILS[K]PPAER	1xDSS [K7]	SMG9	70	VM[K]VMGSGPK	1xDSS [K3]	SMG8	869	SMG9	SMG8	FALSE	0.00	41684196875	NotUnique	1	47.70
45	1834	FALSE	IQQLEDEVKR; |; HLLKAMAK	64.28	DSS	Intra	3	1	IQQLEDEV[K]R	1xDSS [K9]	SMG1	1985	HLL[K]AMAK	1xDSS [K4]	SMG1	3426			FALSE	0.00	26977356.25		3	36.58
19	1834	FALSE	SNTGQKTQPDVMSQNAR; |; KVVDNASQGEGVR	63.08	DSS	Intra	1	1	SNTGQ[K]TQPDVMSQNAR	1xDSS [K6]	SMG1	3545	[K]VVDNASQGEGVR	1xDSS [K1]	SMG1	1628			FALSE	0.00	1164122.75		1	26.80
91	1834	FALSE	SETYAPLFSLPSFHKFCK; |; KDNLNQDTR	62.72	DSS	Intra	1	1	SETYAPLFSLPSFH[K]FCK	1xCarbamidomethyl [C17]; 1xDSS [K15]	SMG1	755	[K]DNLNQDTR	1xDSS [K1]	SMG1	716			FALSE	0.00	3346858.25		1	61.83
82	1834	FALSE	WIFSKFSSSAK; |;ALATKDMR	62.00	DSS	Intra	2	1	WIFS[K]FSSSAK	1xDSS [K5]	SMG1	235	ALAT[K]DMR	1xDSS [K5]	SMG1	127			FALSE	0.00	19230878125		2	55.71
51	1834	FALSE	QAFGKLLK; |; YLKQTSR	61.01	DSS	Intra	1	1	QAFG[K]LLK	1xDSS [K5]	SMG1	815	YL[K]QTSR	1xDSS [K3]	SMG1	1321			FALSE	0.00	2180278.25		1	38.65
95	1834	FALSE	SSVCLATALNPIEQDQKWQSITENVVK; |; IKEQTVPIR	60.96	DSS	Intra	1	1	SSVCLATALNPIEQDQ[K]WQSITENVVK	1xCarbamidomethyl [C4]; 1xDSS [K17]	SMG1	1308	I[K]EQTVPIR	1xDSS [K2]	SMG1	1407			FALSE	0.00		NoQuanValues	1
44	1834	FALSE	WKEPGSGGPQNLSGPGGR; |; KSSALAEYSR	60.79	DSS	Intra	1	1	W[K]EPGSGGPQNLSGPGGR	1xDSS [K2]	SMG9	21	[K]SSALAEYSR	1xDSS [K1]	SMG9	508	SMG9	SMG9	FALSE	0.00		NoQuanValues	1
68	1834	FALSE	AMAKDEEAALADGEDVPYENSVR; |;IQQLEDEVKR	60.79	DSS	Intra	1	1	AMA[K]DEEAALADGEDVPYENSVR	1xDSS [K4]	SMG1	3430	IQQLEDEV[K]R	1xDSS [K9]	SMG1	1985			FALSE	0.00		NoQuanValues	1
49	1834	FALSE	VMKVMGSGPK; |; KIDIIR	59.89	DSS	Inter	3	2	VM[K]VMGSGPK	1xOxidation [M2]; 1xDSS [K3]	SMG8	869	[K]IDIIR	1xDSS [K1]	SMG1	2989	SMG8		FALSE	0.00	347570228125	NotUnique	3	42.12
66	1834	FALSE	IQQLEDEVKR; |; QLGDVKHLLK	58.17	DSS	Intra	2	1	IQQLEDEV[K]R	1xDSS [K9]	SMG1	1985	QLGDV[K]HLLK	1xDSS [K6]	SMG1	3422			FALSE	0.00	11817422.25		2	48.18
21	1834	FALSE	LLVKHAGELR; |; KVVDR	57.56	DSS	Intra	1	1	LLV[K]HAGELR	1xDSS [K4]	SMG1	1794	[K]VVDR	1xDSS [K1]	SMG1	1731			FALSE	0.00		NoQuanValues	1
56	1834	FALSE	NSYAVSVWKR; |; LLVKHAGELR	57.56	DSS	Intra	2	1	NSYAVSVW[K]R	1xDSS [K9]	SMG1	3610	LLV[K]HAGELR	1xDSS [K4]	SMG1	1794			FALSE	0.00	53083338125		2	44.46
72	1834	FALSE	TDSASADPGNLKYSSSR; |; KLLFLGSDGK	57.56	DSS	Intra	1	1	TDSASADPGNL[K]YSSSR	1xDSS [K12]	SMG1	39	[K]LLFLGSDGK	1xDSS [K1]	SMG1	2135			FALSE	0.00		NoQuanValues	1
79	1834	FALSE	IQQLEDEVKR; |; VAEIKVNWFK	57.56	DSS	Intra	1	1	IQQLEDEV[K]R	1xDSS [K9]	SMG1	1985	VAEI[K]VNWFK	1xDSS [K5]	SMG1	2467			FALSE	0.00	1643709.75		1	55.32
37	1834	FALSE	ALETVGEKK; |; KSLGQELR	57.45	DSS	Intra	2	1	ALETVGE[K]K	1xDSS [K8]	SMG1	262	[K]SLGQELR	1xDSS [K1]	SMG1	98			FALSE	0.00	1980131.5		2	33.80
57	1834	FALSE	IQQLEDEVKR; |; EEKIAIMR	56.51	DSS	Intra	1	1	IQQLEDEV[K]R	1xDSS [K9]	SMG1	1985	EE[K]IAIMR	1xDSS [K3]	SMG1	1998			FALSE	0.00	1759448625		1	44.66
69	1834	FALSE	SNTGQKTQPDVMSQNAR; |; VAEIKVNWFK	55.72	DSS	Intra	1	1	SNTGQ[K]TQPDVMSQNAR	1xDSS [K6]	SMG1	3545	VAEI[K]VNWFK	1xDSS [K5]	SMG1	2467			FALSE	0.00	1206007375		1	50.10
13	1834	FALSE	NQDPAHPDKPK; |; KSLGQELR	54.20	DSS	Inter	1	2	NQDPAHPD[K]PK	1xDSS [K9]	SMG8	290	[K]SLGQELR	1xDSS [K1]	SMG1	98	SMG8		FALSE	0.00	1154625.25	NotUnique	1	25.49
59	1834	FALSE	IQQLEDEVKR; |; VNWFKNR	53.55	DSS	Intra	1	1	IQQLEDEV[K]R	1xDSS [K9]	SMG1	1985	VNWF[K]NR	1xDSS [K5]	SMG1	2472			FALSE	0.00	7573038.5		1	44.65
75	1834	FALSE	WKEPGSGGPQNLSGPGGR; |; KLLFLGSDGK	53.55	DSS	Inter	2	2	W[K]EPGSGGPQNLSGPGGR	1xDSS [K2]	SMG9	21	[K]LLFLGSDGK	1xDSS [K1]	SMG1	2135	SMG9		FALSE	0.00	2232822	NotUnique	2	52.92
80	1834	FALSE	SNTGQKTQPDVMSQNAR; |;IGPALKTVGLSLDVSR	52.79	DSS	Intra	1	1	SNTGQ[K]TQPDVMSQNAR	1xDSS [K6]	SMG1	3545	IGPAL[K]TVGLSLDVSR	1xDSS [K6]	SMG1	2258			FALSE	0.00	1184538375		1	55.59
8	1834	FALSE	LATVKQLK; |; KSQER	52.36	DSS	Intra	1	1	LATV[K]QLK	1xDSS [K5]	SMG1	166	[K]SQER	1xDSS [K1]	SMG1	131			FALSE	0.00	1928996.25		1	19.83
71	1834	FALSE	VAEIKVNWFK; |; KLIQK	52.36	DSS	Intra	2	1	VAEI[K]VNWFK	1xDSS [K5]	SMG1	2467	[K]LIQK	1xDSS [K1]	SMG1	3557			FALSE	0.00	2722784375		2	50.92
53	1834	FALSE	SNTGQKTQPDVMSQNAR; |;NSYAVSVWKR	51.45	DSS	Intra	1	1	SNTGQ[K]TQPDVMSQNAR	1xDSS [K6]	SMG1	3545	NSYAVSVW[K]R	1xDSS [K9]	SMG1	3610			FALSE	0.00		NoQuanValues	1
78	1834	FALSE	TDSASADPGNLKYSSSR; |; EFIQQPENKLVLVK	51.19	DSS	Intra	1	1	TDSASADPGNL[K]YSSSR	1xDSS [K12]	SMG1	39	EFIQQPEN[K]LVLVK	1xDSS [K9]	SMG1	178			FALSE	0.00		NoQuanValues	1
92	1834	FALSE	LIQKNLATSADTPPSTVPGTGK; |;IGPALKTVGLSLDVSR	50.47	DSS	Intra	1	1	LIQ[K]NLATSADTPPSTVPGTGK	1xDSS [K4]	SMG1	3561	IGPAL[K]TVGLSLDVSR	1xDSS [K6]	SMG1	2258			FALSE	0.00	47340353125		1	64.19
20	1834	FALSE	KIDIIR;|;KQAPR	50.16	DSS	Inter	1	2	[K]IDIIR	1xDSS [K1]	SMG1	2989	[K]QAPR	1xDSS [K1]	SMG8	616		SMG8	FALSE	0.00	3239713	NotUnique	1	27.44
1	1834	FALSE	DPKTGK; |; GKSLR	49.44	DSS	Intra	1	1	DP[K]TGK	1xDSS [K3]	SMG1	3593	G[K]SLR	1xDSS [K2]	SMG1	2359			FALSE	0.00	2614225.25		1	14.38
83	1834	FALSE	LLAQCSEVQLGKTTTAQDLVQHFK; |; SVKAEYAVAK	49.36	DSS	Intra	1	1	LLAQCSEVQLG[K]TTTAQDLVQHFK	1xCarbamidomethyl [C5]; 1xDSS [K12]	SMG1	1451	SV[K]AEYAVAK	1xDSS [K3]	SMG1	1512			FALSE	0.00	43884878125		1	56.04
94	1834	FALSE	ESALKALNSDMPLYILSSSQGR; |; VMKVMGSGPK	49.36	DSS	Intra	1	1	ESAL[K]ALNSDMPLYILSSSQGR	1xDSS [K5]	SMG8	881	VM[K]VMGSGPK	1xDSS [K3]	SMG8	869	SMG8	SMG8	FALSE	0.00	925827.75		1	69.03
85	1834	FALSE	LLAQCSEVQLGKTTTAQDLVQHFK; |; IKEQTVPIR	48.50	DSS	Intra	1	1	LLAQCSEVQLG[K]TTTAQDLVQHFK	1xCarbamidomethyl [C5]; 1xDSS [K12]	SMG1	1451	I[K]EQTVPIR	1xDSS [K2]	SMG1	1407			FALSE	0.00		NoQuanValues	1
10	1834	FALSE	SNTGQKTQPDVMSQNAR; |; TGKAVQER	47.91	DSS	Intra	1	1	SNTGQ[K]TQPDVMSQNAR	1xDSS [K6]	SMG1	3545	TG[K]AVQER	1xDSS [K3]	SMG1	3596			FALSE	0.00	1078013.5		1	22.66
77	1834	FALSE	EFIQQPENKLVLVK; |; ALATKDMR	47.91	DSS	Intra	1	1	EFIQQPEN[K]LVLVK	1xDSS [K9]	SMG1	178	ALAT[K]DMR	1xDSS [K5]	SMG1	127			FALSE	0.00	19184560		1	54.60
6	1834	FALSE	SVACSPKK; |; KLIQK	47.86	DSS	Intra	1	1	SVACSP[K]K	1xCarbamidomethyl [C4]; 1xDSS [K7]	SMG1	3586	[K]LIQK	1xDSS [K1]	SMG1	3557			FALSE	0.00	2920940.5		1	19.27
32	1834	FALSE	FSSSAKDEVK; |; KSLGQELR	47.74	DSS	Intra	1	1	FSSSA[K]DEVK	1xDSS [K6]	SMG1	241	[K]SLGQELR	1xDSS [K1]	SMG1	98			FALSE	0.00	1836615875		1	32.14
22	1834	FALSE	TGKDNWLER; |; MKHSIK	45.93	DSS	Inter	1	2	TG[K]DNWLER	1xDSS [K3]	SMG1	875	M[K]HSIK	1xDSS [K2]	SMG9	178		SMG9	FALSE	0.00	6143797	NotUnique	1	28.32
36	1834	FALSE	KEEKIAIMR; |;AIPGKR	45.93	DSS	Inter	2	2	KEE[K]IAIMR	1xDSS [K4]	SMG1	1998	AIPG[K]R	1xDSS [K5]	SMG8	827		SMG8	FALSE	0.00		NoQuanValues	2
86	1834	FALSE	WQSITENVVKYLK; |; EKIDMK	45.93	DSS	Intra	1	1	WQSITENVV[K]YLK	1xDSS [K10]	SMG1	1318	E[K]IDMK	1xDSS [K2]	SMG1	1263			FALSE	0.00	5206328		1	57.31
60	1834	FALSE	IQQLEDEVKR; |; GVLKAVTQ	45.72	DSS	Inter	1	2	IQQLEDEV[K]R	1xDSS [K9]	SMG1	1985	GVL[K]AVTQ	1xDSS [K4]	SMG8	987		SMG8	FALSE	0.00		NoQuanValues	1
47	1834	FALSE	TDSASADPGNLKYSSSR; |; KSLGQELR	44.97	DSS	Intra	1	1	TDSASADPGNL[K]YSSSR	1xDSS [K12]	SMG1	39	[K]SLGQELR	1xDSS [K1]	SMG1	98			FALSE	0.00	3061246		1	37.41
30	1834	FALSE	ALETVGEKK; |; ALATKDMR	44.61	DSS	Intra	1	1	ALETVGE[K]K	1xDSS [K8]	SMG1	262	ALAT[K]DMR	1xDSS [K5]	SMG1	127			FALSE	0.00	1893889125		1	31.18
61	1834	FALSE	VAEIKVNWFK; |; TGKAVQER	44.61	DSS	Intra	1	1	VAEI[K]VNWFK	1xDSS [K5]	SMG1	2467	TG[K]AVQER	1xDSS [K3]	SMG1	3596			FALSE	0.00		NoQuanValues	1
70	1834	FALSE	YTMYQNQLLEKIK; |; KLSTQGQVDEK	44.39	DSS	Intra	1	1	YTMYQNQLLE[K]IK	1xDSS [K11]	SMG1	1405	[K]LSTQGQVDEK	1xDSS [K1]	SMG1	1464			FALSE	0.00	965607125		1	50.45
4	1834	FALSE	KSLGQELR;|;KSQER	44.13	DSS	Intra	1	1	[K]SLGQELR	1xDSS [K1]	SMG1	98	[K]SQER	1xDSS [K1]	SMG1	131			FALSE	0.00	10285374		1	18.40
63	1834	FALSE	KLLFLGSDGK;|;KLIQK	43.26	DSS	Intra	1	1	[K]LLFLGSDGK	1xDSS [K1]	SMG1	2135	[K]LIQK	1xDSS [K1]	SMG1	3557			FALSE	0.00	826029		1	47.64
9	1834	FALSE	LLVKHAGELR; |; KAVRDPK	42.46	DSS	Intra	1	1	LLV[K]HAGELR	1xDSS [K4]	SMG1	1794	[K]AVRDPK	1xDSS [K1]	SMG1	3587			FALSE	0.00	1009523375		1	22.23
23	1834	FALSE	KAVEHNIQIGK;|;KSSALAEYSR	40.99	DSS	Inter	1	2	[K]AVEHNIQIGK	1xDSS [K1]	SMG1	3136	[K]SSALAEYSR	1xDSS [K1]	SMG9	508		SMG9	FALSE	0.00	8633808125	NotUnique	1	29.54
33	1834	FALSE	KSLGQELR; |;IDMKK	40.71	DSS	Intra	1	1	[K]SLGQELR	1xDSS [K1]	SMG1	98	IDM[K]K	1xDSS [K4]	SMG1	1267			FALSE	0.00	701929625		1	32.14
48	1834	FALSE	EISGQLKQVYR; |; KLIQK	40.71	DSS	Intra	1	1	EISGQL[K]QVYR	1xDSS [K7]	SMG1	1540	[K]LIQK	1xDSS [K1]	SMG1	3557			FALSE	0.00	1208745875		1	37.46
64	1834	FALSE	DASEETSTSVMQKTPIILSKPPAER; |; GEKEGQRPTQPVYQIQNR	40.50	DSS	Intra	1	1	DASEETSTSVMQ[K]TPIILSKPPAER	1xDSS [K13]	SMG9	63	GE[K]EGQRPTQPVYQIQNR	1xDSS [K3]	SMG9	137	SMG9	SMG9	FALSE	0.00		NoQuanValues	1
55	1834	FALSE	GPVAVTGASTPEGTAPPPPAAPAPPKGEK; |; KSTSSTSLNLK	40.27	DSS	Inter	1	2	GPVAVTGASTPEGTAPPPPAAPAPP[K]GEK	1xDSS [K26]	SMG9	134	[K]STSSTSLNLK	1xDSS [K1]	SMG1	1211	SMG9		FALSE	0.00	5503639375	NotUnique	1	41.81

## Sheet: legend
	column name	description
	crosslink sequence	a display of the dipeptide sequence
	Max. XlinkX Score	the maximum XlinkX score that is found for this crosslink
	Crosslinker	the crosslink reagent
	Crosslink Type	the type of the crosslink (inter- or intra-link)
	# CSMs	the number of crosslink spectrum matches identified for the crosslink
	# Proteins	the number of identified proteins in which the peptide sequence is contained
	Sequence A	the amino acid sequence of the peptide A with the crosslinked amino acid in brackets
	Modifications A	modification found in peptide A of the crosslinked entity
	Accession A	a list of accession of identified crosslinks this crosslink is contained in
	Position A	the position of the crosslink in protein A
	Sequence B	the amino acid sequence of the peptide B with the crosslinked amino acid in brackets
	Modifications B	modification found in peptide B of the crosslinked entity
	Accession B	a list of accession of identified crosslinks this crosslink is contained in
	Position B	the position of the crosslink in protein B
	Protein Descriptions A	a list of descriptions of all proteins the peptide A of the crosslink is contained in
	Protein Descriptions B	a list of descriptions of all proteins the peptide B of the crosslink is contained in
	Is Decoy	indicates wether this identification was retained from the decoy database
	Q-value	the proportion of false positives expected at a score of this
	Abundances	shows the abundance values of the sample
	Quan Info	information on the status of this result item for quantification
	# CSMs	the total number of CSMs identifed
	Top Apex RT [min]	the best apex retention time over all connected consensus features
