# Supplementary figures and images for: Cryo-EM reconstructions of inhibitor-bound SMG1 kinase reveal an autoinhibitory state dependent on SMG8
Source: eLife journal article supplement (doi:10.7554/elife.72353), 2021-10-26

raw images for Figure 1 C

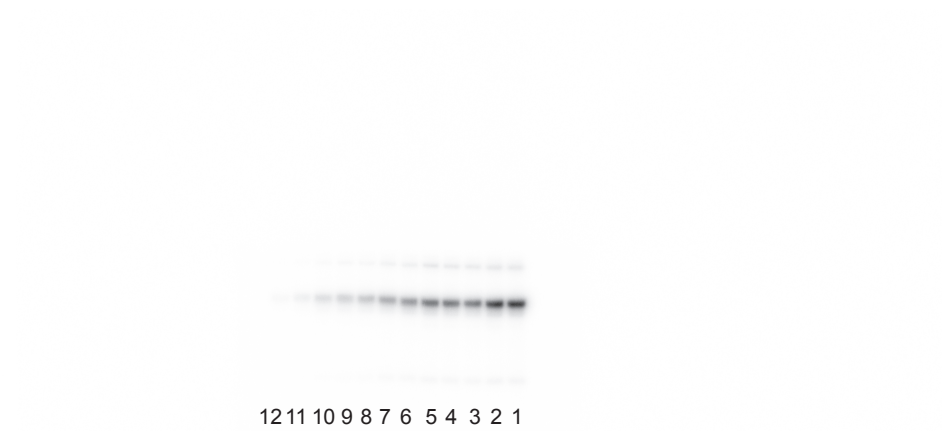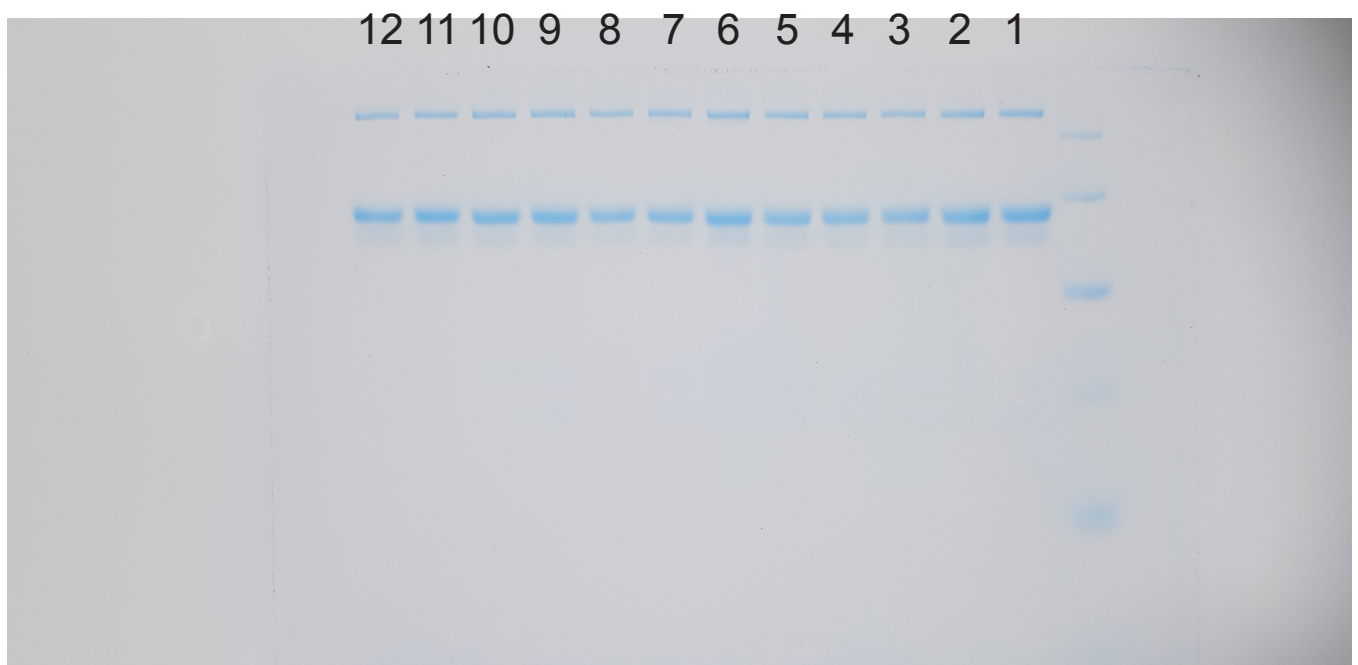

Supplement: supp [file elife-72353-supp-v1.zip]

raw images for Figure 4 Supp. 3 A

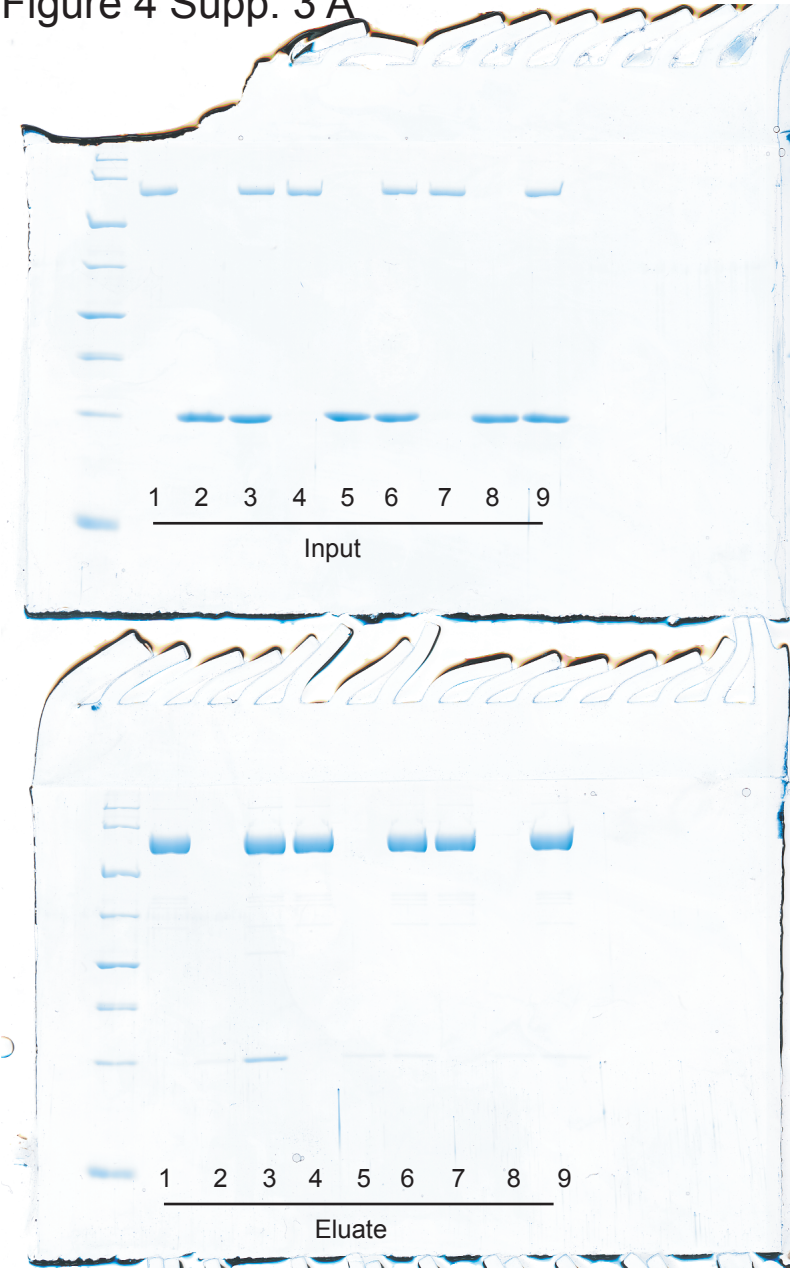

raw image for Figure 4 Supp. 3 B

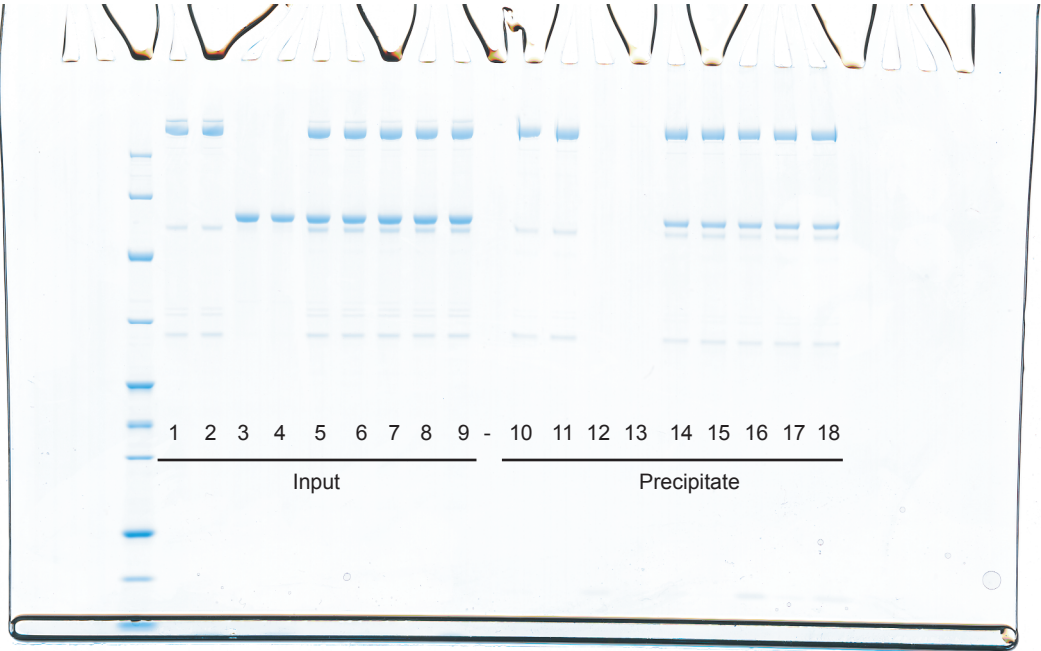

Supplement: supp [file elife-72353-supp-v1.zip]

raw image for Figure 4 Supp. 1

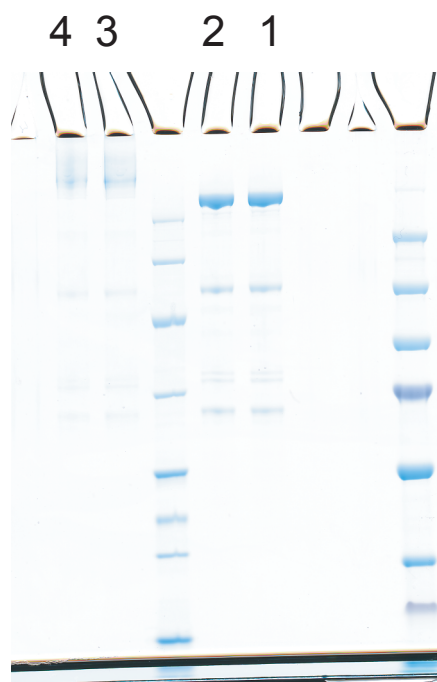

Supplement: supp [file elife-72353-supp-v1.zip]

raw images for Figure 4 D

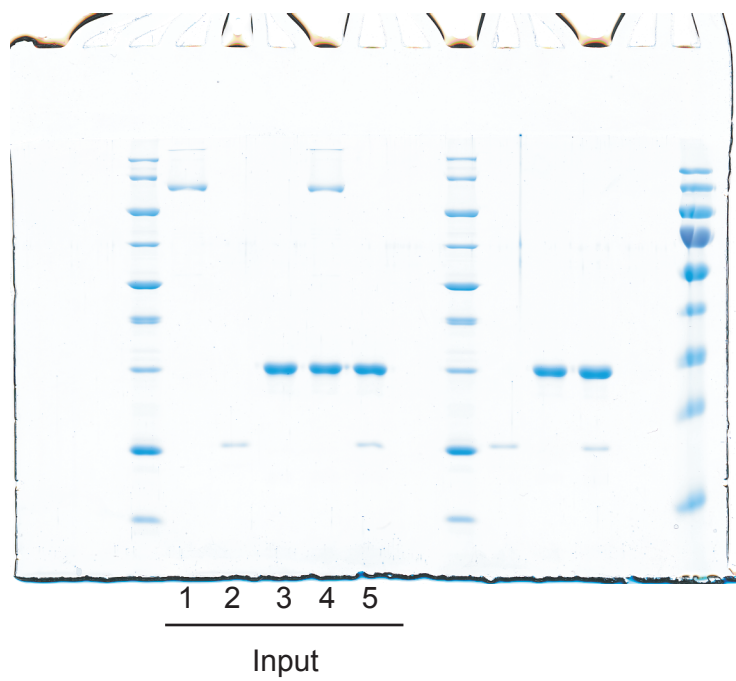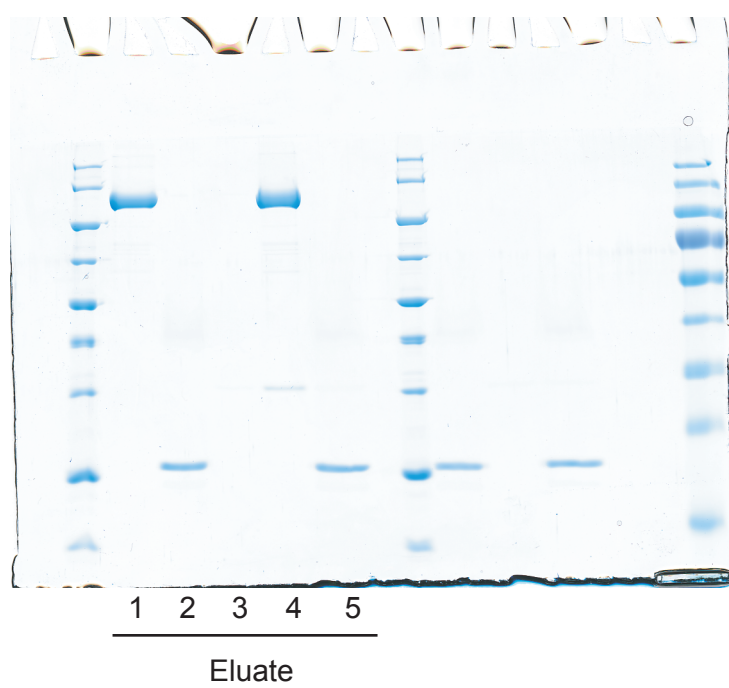

Supplement: supp [file elife-72353-supp-v1.zip]
